# Supplementary material for: Network Pharmacology Combined with Machine Learning to Reveal the Action Mechanism of Licochalcone Intervention in Liver Cancer
Source: MDPI journal article supplement (doi:10.3390/ijms242115935), 2023-11-03
Supplement: s1 [file s1]

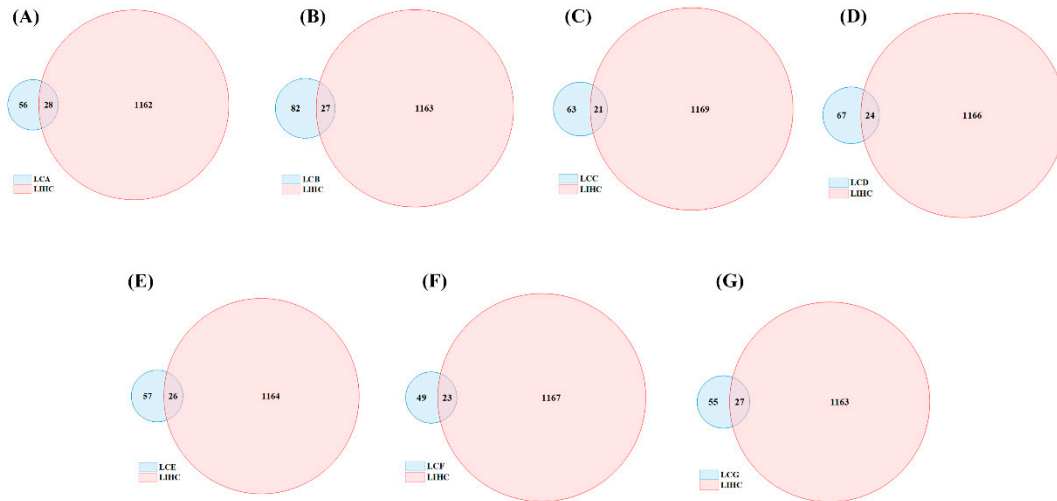

**Figure S1.** Venn diagrams showing the cross-genes shared between licochalcones and LIHC. (A) The number of common genes shared between LCA and LIHC is 28. (B) The number of common genes shared between LCB and LIHC is 27. (C) The number of common genes shared between LCC and LIHC is 21. (D) The number of common genes shared between LCD and LIHC is 24. (E) The number of common genes shared between LCE and LIHC is 26. (F) The number of common genes shared between LCF and LIHC is 23. (G) The number of common genes shared between LCG and LIHC is 27.



|                                                                         |                                                                                                         |            |             |
|-------------------------------------------------------------------------|---------------------------------------------------------------------------------------------------------|------------|-------------|
|                                                                         | <chem>2H))([2H])[2H])[2H])C([2H])([2H])</chem><br><chem>)[2H]</chem>                                    |            |             |
| BuOH                                                                    | <chem>CCCCO</chem>                                                                                      | darkorange | 0.189682388 |
| sitosterol                                                              | <chem>CC[C@H](CC[C@@H](C)[C@H]1CC[C@@H]2[C@@@]1(CC[C@H]3[C@H]2CC=C4[C@@@]3(CC[C@@H](C4)O)C)C(C)C</chem> | darkorange | 0.125221766 |
| 2-Caren-10-al                                                           | <chem>CC1(C2C1C=C(CC2)C=O)C</chem>                                                                      | darkorange | 0.111970159 |
| Methylheptane                                                           | <chem>CCCCC(C)C</chem>                                                                                  | darkorange | 0.172315115 |
| Castanin                                                                | <chem>C[C@H]1[C@H]2[C@](CCC1=O)([C@H]([C@H](C3=C(C(=O)O)[C@]23O)C)O)OC(=O)C</chem>                      | darkorange | 0.108593115 |
| beta-Terpinene                                                          | <chem>CC(C)C1=CCC(=C)CC1</chem>                                                                         | darkorange | 0.18241959  |
| anethole                                                                | <chem>C/C=C/C1=CC=C(C=C1)OC</chem>                                                                      | darkorange | 0.127105293 |
| (E)-1-butoxyhex-2-ene                                                   | <chem>CCCCOC/C=C/CCC</chem>                                                                             | darkorange | 0.124033668 |
| glucuronic acid                                                         | <chem>[C@@H]1([C@@H]([C@H](OC([C@@H]1O)O)C(=O)O)O)O</chem>                                              | darkorange | 0.185911216 |
| Octadiene                                                               | <chem>CCCC/C=C/C=C</chem>                                                                               | darkorange | 0.146917164 |
| WLN: 4OVR                                                               | <chem>CCCCOC(=O)C1=CC=CC=C1</chem><br><chem>C1=CC=C(C=C1)C(=O)CC(=O)C2</chem><br><chem>=CC=CC=C2</chem> | darkorange | 0.138661005 |
| Karenzu DK2<br>(1S,2S)-1,2-dimethylcyclopentane                         | <chem>C[C@H]1CCC[C@@H]1C</chem>                                                                         | darkorange | 0.159564261 |
| 2,2-DIMETHYLPENTAN<br>E                                                 | <chem>CCCC(C)(C)C</chem>                                                                                | darkorange | 0.200316125 |
| 2,3-dimethylhexane<br>(3S)-2,3-dimethylpentane                          | <chem>CCCC(C)C(C)C</chem>                                                                               | darkorange | 0.194485005 |
| 5,6,7,8-Tetrahydro-<br>2,4-dimethylquinoline<br>(4S)-2,4-dimethylhexane | <chem>CC[C@H](C)C(C)C</chem>                                                                            | darkorange | 0.192746157 |
|                                                                         | <chem>CC1=CC(=NC2=C1CCCC2)C</chem>                                                                      | darkorange | 0.120459341 |
|                                                                         | <chem>CC[C@H](C)CC(C)C</chem>                                                                           | darkorange | 0.164820293 |
| HEX                                                                     | <chem>C1CC(C(=O)N(C1)O)P(=O)(O)O</chem>                                                                 | darkorange | 0.135622378 |
| Sextone B                                                               | <chem>CC1CCCCC1</chem>                                                                                  | darkorange | 0.154196234 |

|                                      |                                                                                                                                                                                                                                       |            |             |
|--------------------------------------|---------------------------------------------------------------------------------------------------------------------------------------------------------------------------------------------------------------------------------------|------------|-------------|
| Methylcyclopentane                   | <chem>CC1CCCC1</chem>                                                                                                                                                                                                                 | darkorange | 0.151510089 |
| Docosyl caffeate                     | <chem>CCCCCCCCCCCCCCCCCCCCCOC(=O)/C=C/C1=CC(=C(C=C1)O)O</chem>                                                                                                                                                                        | darkorange | 0.119080858 |
| 2-methyl-6-ethyldecane               | <chem>CCCCC(CC)CCCC(C)C</chem>                                                                                                                                                                                                        | darkorange | 0.147979067 |
| Pentadecanol                         | <chem>CCCCCCCCCCCCCCCCCO</chem>                                                                                                                                                                                                       | darkorange | 0.17943937  |
| Isohexane                            | <chem>CCCC(C)C</chem>                                                                                                                                                                                                                 | darkorange | 0.18380874  |
| uralenneoside                        | <chem>C1[C@H]([C@@H]([C@H]([C@@H](O1)OC(=O)C2=CC(=C(C=C2)O)O)O)O)OCCCC.CCCCCC.CCCCCC.CC.CCCCCC.CCCCCCCCCC.CCCCCCCCCCCCCC/C=C/C.CCCCCC(C)(C)C.CCCCCC(F)(F)F.CCCCCC1CCCCC1.CCCCC1CCCC1.CCCCCC1=CC=CC=C1.CCCCC(C)C.CCCC/C=C/C.CCC</chem> | darkorange | 0.105127513 |
| (E)-dodec-2-ene                      | <chem>CC(C)CC</chem>                                                                                                                                                                                                                  | darkorange | 0.116404506 |
| Cyclobutanol, 1-ethyl-               | <chem>CCC1(CCC1)O</chem>                                                                                                                                                                                                              | darkorange | 0.17984377  |
| 2-Tetradecanone                      | <chem>CCCCCCCCCCCCC(=O)C</chem>                                                                                                                                                                                                       | darkorange | 0.154087032 |
| 3,3-Dimethylpentane                  | <chem>CCC(C)(C)CC</chem>                                                                                                                                                                                                              | darkorange | 0.198875736 |
| 2-Ethyl-p-xylene                     | <chem>CCC1=C(C=CC(=C1)C)C</chem>                                                                                                                                                                                                      | darkorange | 0.17858198  |
| 3-methylheptane                      | <chem>CCCCC(C)CC</chem>                                                                                                                                                                                                               | darkorange | 0.15832641  |
| 3-methylhexane                       | <chem>CCCC(C)CC</chem>                                                                                                                                                                                                                | darkorange | 0.172136129 |
| 3-Methylpentane                      | <chem>CCC(C)CC</chem>                                                                                                                                                                                                                 | darkorange | 0.180786826 |
| 3-Ethylpentane                       | <chem>CCC(CC)CC</chem>                                                                                                                                                                                                                | darkorange | 0.196244168 |
| 2,6,10-trimethyldodecane             | <chem>CCC(C)CCCC(C)CCCC(C)C</chem>                                                                                                                                                                                                    | darkorange | 0.14867203  |
| 5,6,7,8-Tetrahydro-4-methylquinoline | <chem>CC1=C2CCCCC2=NC=C1CCCCCCCCCCCCC=CCCC(=O)O</chem>                                                                                                                                                                                | darkorange | 0.126626737 |
| icos-5-enoic acid                    | <chem>CCCCCCCCCCCCCCCC=CCCC(=O)O</chem>                                                                                                                                                                                               | darkorange | 0.126911161 |
| 12-methyltetradecanoate              | <chem>CCC(C)CCCCCCCCCCCC(=O)[O-]</chem>                                                                                                                                                                                               | darkorange | 0.127554046 |

|                                                            |                                                                                            |            |             |
|------------------------------------------------------------|--------------------------------------------------------------------------------------------|------------|-------------|
| gadelaidic acid                                            | <chem>CCCCCCCCC/C=C/CCCCCCCC(=O)O</chem>                                                   | darkorange | 0.127739802 |
| Mipax                                                      | <chem>COC(=O)C1=CC=CC=C1C(=O)O</chem>                                                      | darkorange | 0.142481027 |
| DIBP                                                       | <chem>CC(C)COC(=O)C1=CC=CC=C1C(=O)OCC(C)C</chem>                                           | darkorange | 0.133024804 |
| PENTYLFURAN                                                | <chem>CCCCC1=CC=CO1</chem>                                                                 | darkorange | 0.172010563 |
| (-)-Menthol                                                | <chem>C[C@@H]1CC[C@H]([C@@H](C1)O)C(C)C</chem>                                             | darkorange | 0.146579818 |
| DBP                                                        | <chem>CCCCOC(=O)c1ccccc1C(=O)OCC</chem>                                                    | darkorange | 0.138464758 |
| 2-heptanone                                                | <chem>CCCCCC(=O)C</chem>                                                                   | darkorange | 0.149829471 |
| WLN: VH6                                                   | <chem>CCCCCCC=O</chem>                                                                     | darkorange | 0.162569312 |
| Inermine                                                   | <chem>C1[C@@H]2[C@H](C3=C(O1)C=C(C=C3)O)OC4=CC5=C(C=C24)OCO5</chem>                        | green      | 0.11794432  |
| Medicarpin                                                 | <chem>COC1=CC2=C(C=C1)[C@@H]3COC4=C([C@@H]3O2)C=CC(=C4)O</chem>                            | green      | 0.115257005 |
| 2',7-Dihydroxy-4'-methoxyisoflavan-7-O-β-d-glucopyranoside | <chem>CO[C@H]1c2ccc(O[C@@H]3O[C@H](CO)[C@@H](O)[C@H]3O)cc2O[C@@H](O)[C@@H]1c1ccccc1</chem> | green      | 0.086007388 |
| glyasperin B                                               | <chem>CC(=CCC1=C(C=C2C(=C1O)C(=O)C(CO2)C3=C(C=C(C=C3)O)O)OC)C</chem>                       | green      | 0.114582424 |
| glyasperin F                                               | <chem>CC1(C=CC2=C(C=CC(=C2O1)C3COC4=CC(=CC(=C4C3=O)O)O)O)C</chem>                          | green      | 0.121682439 |
| Glyasperin C                                               | <chem>CC(=CCC1=C(C2=C(C=C1O)OC[C@H](C2)C3=C(C=C(C=C3)O)O)OC)C</chem>                       | green      | 0.134921334 |
| glyasperins D                                              | <chem>CC(=CCC1=C(C=C2C(=C1OC)C[C@@H](CO2)C3=C(C=C(C=C3)O)O)OC)C</chem>                     | green      | 0.14212137  |
| glyasperins Z                                              | <chem>COc1ccc([C@H]2COc3cc(O)ccc3C2)c(O)c1CC=C(C)C</chem>                                  | green      | 0.162283584 |
| kanzonols X                                                | <chem>CC(=CCC1=C(C=CC(=C1O)[C@H]2CC3=C(C=C(C=C3)O)CC=C(C)C)OC2)O)C</chem>                  | green      | 0.168709228 |
| licoagropin                                                | <chem>CC(C)=CCc1c(C)ccc2c1OC[C@H]1c3ccc(C)cc3O[C@@H]21</chem>                              | green      | 0.152088975 |

|                                                           |                                                                                                            |       |             |
|-----------------------------------------------------------|------------------------------------------------------------------------------------------------------------|-------|-------------|
| Phaseolinisoflavan                                        | <chem>CC1(C=CC2=C(O1)C=CC(=C2O)[C@H]3CC4=C(C=C(C=C4)O)OC3)C</chem>                                         | green | 0.161029694 |
| Licoricidin                                               | <chem>CC(=CCC1=C(C=CC(=C1O)[C@H]2CC3=C(C=C(C(=C3OC)CC=C(C)C)O)OC2)O)C</chem>                               | green | 0.14004529  |
| lcoisoflavanone                                           | <chem>CC1(C=CC2=C(O1)C=CC(=C2O)C3COC4=CC(=CC(=C4C3=O)O)O)C</chem>                                          | green | 0.128202427 |
| shinpterocarpin                                           | <chem>CC1(C=CC2=C(O1)C=CC3=C2O[C@@H]4[C@H]3OC5=C4C=C(C(=C5)O)C</chem>                                      | green | 0.144667191 |
| Hispaglabridin B                                          | <chem>CC1(C=CC2=C(O1)C=CC(=C2O)[C@H]3CC4=C(C5=C(C=C4)OC(C(=C5)(C)C)OC3)C</chem>                            | green | 0.173400128 |
| Glabridin                                                 | <chem>CC1(C=CC2=C(O1)C=CC3=C2O[C@H](C3)C4=C(C=C(C=C4)O)O)C</chem>                                          | green | 0.168251724 |
| (-)-Medicocarpin                                          | <chem>COC1=CC2=C(C=C1)[C@@H]3COC4=C([C@@H]3O2)C=CC(=C4)O[C@H]5[C@@H]([C@H]([C@@H]([C@H](O5)CO)O)O)O</chem> | green | 0.09462257  |
| Hispaglabridin A                                          | <chem>CC(=CCC1=C(C=CC(=C1O)[C@H]2CC3=C(C4=C(C=C3)OC(C=C4)(C)C)OC2)O)C</chem>                               | green | 0.181463464 |
| 1-Methoxyphaseollidin                                     | <chem>CC(=CCC1=C(C=CC2=C1O[C@@H]3[C@H]2COC4=C3C(=CC(=C4)O)OC)O)C</chem>                                    | green | 0.150115742 |
| 3'( $\gamma,\gamma$ -dimethylallyl)-kievitone             | <chem>CC(C)=CCc1c(O)ccc([C@H]2COc3c(CC=C(C)C)c(O)cc(O)c3C2=O)c1O</chem>                                    | green | 0.13977841  |
| 3'-Hydroxy-4'-O-Methylglabridin                           | <chem>CC1(C=CC2=C(O1)C=CC3=C2O[C@H](C3)C4=C(C(=C(C=C4)O)C)O)O)C</chem>                                     | green | 0.176004766 |
| 3'-Methoxyglabridin                                       | <chem>CC1(C=CC2=C(O1)C=CC3=C2OCC(C3)C4=C(C(=C(C=C4)O)OC)O)C</chem>                                         | green | 0.180980111 |
| 1-Methoxyfificolinol                                      | <chem>CC(=CCC1=CC2=C(C=C1O)O[C@@H]3[C@H]2COC4=C3C(=C(C(=C4)O)CC=C(C)C)OC)C</chem>                          | green | 0.125189952 |
| 2-[(3R)-8,8-dimethyl-3,4-dihydro-2H-pyrano[6,5-f]chromen- | <chem>COc1ccc([C@@H]2COc3c(ccc4c3C=CC(C)(C)O4)C2)c(O)c1</chem>                                             | green | 0.172713796 |

|                       |                                                                                                                                                  |       |             |
|-----------------------|--------------------------------------------------------------------------------------------------------------------------------------------------|-------|-------------|
| 3-yl]-5-methoxyphenol |                                                                                                                                                  |       |             |
| Licoriisoflavan A     | <chem>CC(=CCC1=C(C=CC(=C1O)[C@H]2CC3=C(C(=C(C=C3OC2)OC)CC=C(C)C)OC)O)C</chem>                                                                    | green | 0.147713866 |
| Kanzonol F            | <chem>CC(=CCC1=C(C2=C(C=C1O)OC[C@@H]3[C@H]2OC4=C3C=C5C=CC(OC5=C4)(C)C)OC)C</chem>                                                                | green | 0.120374282 |
| Kanzonol H            | <chem>CC(=CCC1=C(C=CC(=C1O)[C@H]2CC3=C(C=C4C(=C3OC)CCC(O4)(C)C)OC2)O)C</chem>                                                                    | green | 0.126827382 |
| Vestitol              | <chem>COC1=CC(=C(C=C1)C2CC3=C(C=C(C=C3)O)OC2)O</chem>                                                                                            | green | 0.148792488 |
| Licoagrocarpin        | <chem>CC(=CCC1=C(C=CC2=C1OC[C@@H]3[C@H]2OC4=C3C=CC(=C4)OC)O)C</chem>                                                                             | green | 0.154527467 |
| Glyasperins K         | <chem>CC(=CCC1=C(C=C2C(=C1O)C(=O)[C@H](CO2)C3=C(C=C(C=C3)OC)O)OC)C</chem>                                                                        | green | 0.112671039 |
| Glyasperins M         | <chem>CC1(C=CC2=C(O1)C=CC(=C2O)C3COC4=C(C3=O)C(=CC(=C4)O)OC)C</chem>                                                                             | green | 0.130754363 |
| Vicenin-2             | <chem>C1=CC(=CC=C1C2=CC(=O)C3=C(C=C(C(=C3O2)[C@H]4[C@@H]([C@H]([C@@H]([C@H](O4)CO)O)O)O)[C@H]5[C@@H]([C@H]([C@@H]([C@H](O5)CO)O)O)O)O)O</chem>   | pink  | 1.047954256 |
| vitexin               | <chem>C1=CC(=CC=C1C2=CC(=O)C3=C(O2)C(=C(C=C3O)O)[C@H]4[C@@H]([C@H]([C@@H]([C@H](O4)CO)O)O)O)O</chem>                                             | pink  | 0.674515579 |
| violanthin            | <chem>C[C@H]1[C@@H]([C@H]([C@H]([C@@H](O1)C2=C3C(=C(C(=C2O)[C@H]4[C@@H]([C@H]([C@@H]([C@H](O4)CO)O)O)O)O)C(=O)C=C(O3)C5=CC=C(C=C5)O)O)O)O</chem> | pink  | 0.806859156 |
| schaftoside           | <chem>C1[C@@H]([C@@H]([C@H]([C@@H](O1)C2=C3C(=C(C(=C2O)[C@H]4[C@@H]([C@H]([C@@H]([C@H](O4)CO)O)O)O)O)C(=O)C=C(O3)C5=CC=C(C=C5)O)O)O)O</chem>     | pink  | 0.78202863  |

|                   |                                                                                                                                                |      |             |
|-------------------|------------------------------------------------------------------------------------------------------------------------------------------------|------|-------------|
| Isoviolanthin     | <chem>C[C@H]1[C@@H]([C@H]([C@H]([C@@H](O1)C2=C(C(=C3C(=C2O)C(=O)C=C(O3)C4=CC=C(C=C4)O)[C@H]5[C@@H]([C@H]([C@@H]([C@H](O5)CO)O)O)O)O)O)O</chem> | pink | 0.823532743 |
| Isoschaftoside    | <chem>C1[C@@H]([C@@H]([C@H]([C@@H](O1)C2=C(C(=C3C(=C2O)C(=O)C=C(O3)C4=CC=C(C=C4)O)[C@H]5[C@@H]([C@H]([C@@H]([C@H](O5)CO)O)O)O)O)O)O</chem>     | pink | 0.787221161 |
| Morusin           | <chem>CC(=CCC1=C(OC2=C(C1=O)C(=CC3=C2C=CC(O3)(C)C)O)C4=C(C=C(C=C4)O)O)C</chem>                                                                 | red  | 0.092492024 |
| Glycyrol          | <chem>CC(=CCC1=C(C2=C(C=C1O)OC(=O)C3=C2OC4=C3C=CC(=C4)O)OC)C</chem>                                                                            | red  | 0.116557341 |
| Jaranol           | <chem>COC1=CC(=C2C(=C1)OC(=C(C2=O)OC)C3=CC=C(C=C3)O)O</chem>                                                                                   | red  | 0.102628737 |
| Neouralenol       | <chem>CC(=CCC1=C(C=CC(=C1O)O)C2=C(C(=O)C3=CC(=C(C=C3O2)O)O)O)C</chem>                                                                          | red  | 0.132493586 |
| isorhamnetin      | <chem>COC1=C(C=CC(=C1)C2=C(C(=O)C3=C(C=C(C=C3O2)O)O)O)O</chem>                                                                                 | red  | 0.096726622 |
| Lupiwighteone     | <chem>CC(=CCC1=C2C(=C(C=C1O)O)C(=O)C(=CO2)C3=CC=C(C=C3)O)C</chem>                                                                              | red  | 0.112937352 |
| formononetin      | <chem>COC1=CC=C(C=C1)C2=COC3=C(C2=O)C=CC(=C3)O</chem>                                                                                          | red  | 0.105615408 |
| Scopoletol        | <chem>COC1=C(C=C2C(=C1)C=CC(=O)O2)O</chem>                                                                                                     | red  | 0.097282987 |
| Calycosin         | <chem>COC1=C(C=C(C=C1)C2=COC3=C(C(C2=O)C=CC(=C3)O)O</chem>                                                                                     | red  | 0.109979252 |
| kaempferol        | <chem>C1=CC(=CC=C1C2=C(C(=O)C3=CC(=C(C=C3O2)O)O)O)O</chem>                                                                                     | red  | 0.104201502 |
| 8-Prenylwighteone | <chem>CC(=CCC1=C(C(=C2C(=C1O)C(=O)C(=CO2)C3=CC=C(C=C3)O)C=C(C)C)O)C</chem>                                                                     | red  | 0.112820541 |
| glyasperin E      | <chem>COc1cc2oc(Oc3ccc(O)cc3O)c(-c3ccccc3)c(=O)c2cc1CC=C(C)C</chem>                                                                            | red  | 0.083886213 |
| Isotrifoliol      | <chem>COC1=CC(=CC2=C1C3=C(C4=C(O3)C=C(C=C4)O)C(=O)O2)O</chem>                                                                                  | red  | 0.09888694  |



|                                                                                                     |                                                                                            |     |             |
|-----------------------------------------------------------------------------------------------------|--------------------------------------------------------------------------------------------|-----|-------------|
|                                                                                                     | <chem>CC(=CCC1=C(C=CC(=C1O)C2=COC3=CC(=C(C(=C3C2=O)O)CC=C(C(C)C)OC)O)C</chem>              | red | 0.137655058 |
| kanzonols K                                                                                         |                                                                                            |     |             |
|                                                                                                     | <chem>CC(=CCC1=C(C(=C2C(=C1O)C(=O)C(=CO2)C3=C4C(=C(C=C3)O)C=CC(O4)(C)C)CC=C(C)C)O)C</chem> | red | 0.108205898 |
| kanzonols L                                                                                         |                                                                                            |     |             |
|                                                                                                     | <chem>CC1(C=CC2=C(O1)C=CC(=C2O)C3=COC4=C(C3=O)C(=C(C(=C4)O)CCC(C)(C)O)O)C</chem>           | red | 0.097718778 |
| kanzonols T                                                                                         |                                                                                            |     |             |
|                                                                                                     | <chem>CC1(C=CC2=C(O1)C=CC3=C2OC(=O)C(=C3)C4=C(C=C(C(=C4)O)O)C</chem>                       | red | 0.081927711 |
| kanzonols W                                                                                         |                                                                                            |     |             |
| (2S)-6-(2,4-dihydroxyphenyl)-2-(2-hydroxypropan-2-yl)-4-methoxy-2,3-dihydrofuro[3,2-g]chromen-7-one | <chem>CC(C)([C@@H]1CC2=C(O1)C=C3C(=C2OC)C=C(C(=O)O3)C4=C(C=C(C(=C4)O)O)O</chem>            | red | 0.088443124 |
|                                                                                                     | <chem>CC1(C=CC2=C(O1)C(=CC(=C2)C3=COC4=CC(=CC(=C4C3=O)O)O)O)C</chem>                       | red | 0.112118155 |
| Semilicoisoflavone B                                                                                |                                                                                            |     |             |
|                                                                                                     | <chem>CC(=CCC1=C2C(=C(C=C1O)O)C(=O)C(=C(O2)C3=CC=CC(=C3)O)C</chem>                         | red | 0.121051245 |
| Glepidotin A                                                                                        |                                                                                            |     |             |
| 3-(2-hydroxy-4-methoxyphenyl)-2H-chromen-7-ol                                                       | <chem>COC1=CC(=C(C=C1)C2=CC3=C(C=C(C(=C3)O)OC2)O</chem>                                    | red | 0.07286876  |
| 8-(6-hydroxy-2-benzofuranyl)-2,2-dimethyl-5-chromenol                                               | <chem>CC1(C)C=Cc2c(O)ccc(-c3cc4ccc(O)cc4o3)c2O1</chem>                                     | red | 0.075776073 |
|                                                                                                     | <chem>CC(=CCC1=C(C=CC(=C1)C2=C(C3=CC(=C(C(=C3O2)OC)OC)O)O)C</chem>                         | red | 0.103324054 |
| Liconeolignan                                                                                       |                                                                                            |     |             |
| 3-(2,4-dihydroxyphenyl)-8-(1,1-dimethylprop-2-enyl)-7-hydroxy-5-methoxy-coumarin                    | <chem>C=CC(C)(C)c1c(O)cc(OC)c2cc(-c3ccc(O)cc3O)c(=O)oc12</chem>                            | red | 0.103572564 |
|                                                                                                     | <chem>CC(=CCC1=CC2=C(C(=C1O)OC(=CC2=O)C3=CC=C(C(=C3)O)C</chem>                             | red | 0.088572731 |
| Licoflavone                                                                                         |                                                                                            |     |             |
| 7-hydroxy-2-[4-hydroxy-3-(3-methylbut-2-enyl)phenyl]-6-(3-                                          | <chem>CC(C)=CCc1cc(-c2cc(=O)c3cc(CC=C(C)C)c(O)cc3o2)ccc1O</chem>                           | red | 0.091681419 |

|                                                                            |                                                                           |     |             |
|----------------------------------------------------------------------------|---------------------------------------------------------------------------|-----|-------------|
| methylbut-2-enyl)chromone                                                  | <chem>CC(=CCC1=C(C2=C(C=C1O)OC(=C(C2=O)O)C3=CC=C(C=C3)O)O)C</chem>        | red | 0.123649578 |
| Licoflavonol                                                               | <chem>CC(=CCC1=C(C=CC(=C1)C2=CC(=O)C3=C(C=C(C=C3O2)O)O)O)C</chem>         | red | 0.101835871 |
| Yinyanghuo D                                                               | <chem>CC(=CCC1=C(C=C(C(=C1OC)C2=COC3=C(C2=O)C=CC(=C3)O)O)OC)C</chem>      | red | 0.136174598 |
| Licoricone                                                                 | <chem>CC(=CCC1=C(C2=C(C=C1O)OC=C(C2=O)C3=CC=C(C=C3)OC)O)C</chem>          | red | 0.130976186 |
| Gancaonin A                                                                | <chem>CC(=CCC1=C(C2=C(C=C1O)OC=C(C2=O)C3=CC(=C(C=C3)OC)O)O)C</chem>       | red | 0.134322854 |
| Gancaonin B                                                                | <chem>C/C(=C\CC1=C2C(=C(C=C1O)O)C(=O)C(=CO2)C3=CC=C(C=C3)O)/CO</chem>     | red | 0.105624485 |
| Gancaonin C                                                                | <chem>COC1=CC(=C2C(=C1)OC=C(C2=O)C3=CC=C(C=C3)O)O</chem>                  | red | 0.114507158 |
| Prunetin                                                                   | <chem>C/C(=C\CC1=C2C(=C(C=C1O)O)C(=O)C(=CO2)C3=CC(=C(C=C3)OC)O)/CO</chem> | red | 0.103236562 |
| Gancaonin D                                                                |                                                                           |     |             |
| 3-(3,4-dihydroxyphenyl)-5,7-dihydroxy-8-(3-methylbut-2-enyl)chromone       | <chem>CC(C)=CCc1c(O)cc(O)c2c(=O)c(-c3ccc(O)c(O)c3)coc12</chem>            | red | 0.11449599  |
| 5,7-dihydroxy-3-(4-methoxyphenyl)-8-(3-methylbut-2-enyl)chromone           | <chem>COc1ccc(-c2coc3c(CC=C(C)C)c(O)cc(O)c3c2=O)cc1</chem>                | red | 0.120476598 |
| 5,7-dihydroxy-3-(2-hydroxy-4-methoxyphenyl)-6-(3-methylbut-2-enyl)chromone | <chem>COc1ccc(-c2coc3cc(O)c(CC=C(C)C)c(O)c3c2=O)c(O)c1</chem>             | red | 0.131132561 |
| 2-(3,4-dihydroxyphenyl)-5,7-dihydroxy-6-(3-methylbut-2-enyl)chromone       | <chem>CC(C)=CCc1c(O)cc2oc(-c3ccc(O)c(O)c3)cc(=O)c2c1O</chem>              | red | 0.105866385 |

|                                                                             |                                                                               |     |             |
|-----------------------------------------------------------------------------|-------------------------------------------------------------------------------|-----|-------------|
| Gancaonin P                                                                 | <chem>CC(=CCC1=C(C2=C(C=C1O)OC(=C(C2=O)O)C3=CC(=C(C=C3)O)O)OC</chem>          | red | 0.124225303 |
| Gancaonin Q                                                                 | <chem>CC(=CCC1=C(C=CC(=C1)C2=CC(=O)C3=C(O2)C=C(C(=C3O)CC=C(C(C)C)O)O)C</chem> | red | 0.103695699 |
| 3-[4,6-dihydroxy-2-methoxy-3-(3-methylbut-2-enyl)phenyl]-7-hydroxy-chromone | <chem>COc1c(CC=C(C)C)c(O)cc(O)c1-c1coc2cc(O)ccc2c1=O</chem>                   | red | 0.136811442 |
| Glycycoumarin                                                               | <chem>CC(=CCC1=C(C2=C(C=C1O)OC(=O)C(=C2)C3=C(C=C(C=C3)O)O)OC)C</chem>         | red | 0.124516309 |
| Glycyrin                                                                    | <chem>CC(=CCC1=C(C=C2C(=C1OC)C=C(C(C(=O)O2)C3=C(C=C(C=C3)O)O)OC)C</chem>      | red | 0.123501712 |
| Licocoumarone                                                               | <chem>CC(=CCC1=C(C2=C(C=C1O)OC(=C2)C3=C(C=C(C=C3)O)O)OC)C</chem>              | red | 0.132998553 |
| Licoisoflavone                                                              | <chem>CC(=CCC1=C(C=CC(=C1O)OC(=O)C(=C2)C3=C(C=C(C=C3)O)O)OC)C</chem>          | red | 0.13448577  |
| Licoisoflavone B                                                            | <chem>CC1(C=CC2=C(O1)C=CC(=C2O)C3=COC4=CC(=CC(=C4C3=O)O)O)C</chem>            | red | 0.097201276 |
| licopyranocoumarin                                                          | <chem>CC1(CCC2=C(O1)C=C3C(=C2OC)C=C(C(C(=O)O3)C4=C(C=C(C=C4)O)O)CO</chem>     | red | 0.080516206 |
| Glyzaglabrin                                                                | <chem>C1OC2=C(O1)C(=C(C=C2)C3=COC4=C(C3=O)C=CC(=C4)O)O</chem>                 | red | 0.09679194  |
| Glabrene                                                                    | <chem>CC1(C=CC2=C(C=CC(=C2O1)C3=CC4=C(C=C(C=C4)O)OC3)O)C</chem>               | red | 0.07349858  |
| Glabrone                                                                    | <chem>CC1(C=CC2=C(O1)C=CC(=C2O)C3=COC4=C(C3=O)C=CC(=C4)O)C</chem>             | red | 0.095031063 |
| 1,3-dihydroxy-9-methoxy-6-benzofurano[3,2-c]chromenone                      | <chem>COc1ccc2c(c1)oc1c3c(O)cc(O)cc3oc(=O)c21</chem>                          | red | 0.097635026 |
| 1,3-dihydroxy-8,9-dimethoxy-6-benzofurano[3,2-c]chromenone                  | <chem>COc1cc2oc3c4c(O)cc(O)cc4oc(=O)c3c2cc1OC</chem>                          | red | 0.09431335  |

|                                              |                                                                                                                                                    |     |             |
|----------------------------------------------|----------------------------------------------------------------------------------------------------------------------------------------------------|-----|-------------|
| Eurycarpin A                                 | <chem>CC(=CCC1=C(C=CC(=C1O)C2=COC3=C(C2=O)C=CC(=C3O)O)C</chem>                                                                                     | red | 0.134634289 |
| Uralenol                                     | <chem>CC(=CCC1=C(C(=CC(=C1)C2=C(C(=O)C3=C(C=C(C=C3O2)O)O)O</chem>                                                                                  | red | 0.113359375 |
| Uralenol-3-methylether                       | <chem>)O)O)C</chem><br><chem>CC(=CCC1=C(C(=CC(=C1)C2=C(C(=O)C3=C(C=C(C=C3O2)O)O)O</chem>                                                           | red | 0.118023838 |
| Uralene                                      | <chem>C)O)O)C</chem><br><chem>CC(=CCC1=CC(=C(C=C1C2=C(C(=O)C3=C(O2)C=CC(=C3O)O)OC</chem>                                                           | red | 0.127864085 |
| Isoglycyrol                                  | <chem>)O)O)C</chem><br><chem>CC1(CCC2=C(O1)C=C3C(=C2OC</chem>                                                                                      | red | 0.083975663 |
| Isolicoflavonol                              | <chem>)C4=C(C5=C(O4)C=C(C=C5)O)C(=O)O3)C</chem><br><chem>CC(=CCC1=C(C=CC(=C1)C2=C(C(=O)C3=C(C=C(C=C3O2)O)O)O</chem>                                | red | 0.111879351 |
| isoglycycoumarin                             | <chem>)O)C</chem><br><chem>CC1(CCC2=C(O1)C=C3C(=C2OC</chem>                                                                                        | red | 0.082898814 |
| HMO                                          | <chem>)C=C(C(=O)O3)C4=C(C=C(C=C4)O)O)C</chem><br><chem>COc1ccc2c(=O)c(-</chem>                                                                     | red | 0.1043217   |
| Quercetin der.                               | <chem>c3ccc(O)cc3)coc2c1</chem><br><chem>COc1cc(-</chem>                                                                                           | red | 0.096192492 |
| Daidzein dimethyl ether                      | <chem>c2oc3cc(O)cc(O)c3c(=O)c2OC)ccc1O</chem><br><chem>COC1=CC=C(C=C1)C2=COC3=C</chem>                                                             | red | 0.098737435 |
| Inflacoumarin A                              | <chem>(C2=O)C=CC(=C3)OC</chem><br><chem>CC(C)=CCc1cc2c(-</chem>                                                                                    | red | 0.08630536  |
| 7,2',4'-trihydroxy-5-methoxy-3-aryl coumarin | <chem>c3ccc(O)cc3)cc(=O)oc2cc1O</chem><br><chem>COC1=CC(=CC2=C1C=C(C(=O)O2)C3=C(C=C(C=C3)O)O)O</chem>                                              | red | 0.103651073 |
| Artonin E                                    | <chem>CC(=CCC1=C(OC2=C(C1=O)C(=CC3=C2C=CC(O3)(C)C)O)C4=CC(=C(C=C4O)O)O)C</chem><br><chem>CC(=CCC1=C(C=C2C(=C1O)C(=O)C(=CO2)C3=CC=C(C=C3)O)O</chem> | red | 0.092554963 |
| Gancaonin G                                  | <chem>C)C</chem><br><chem>CC(=CCC1=C(C2=C(C=C1O)OC=C(C2=O)C3=CC4=C(C(=C3)O)OC</chem>                                                               | red | 0.138815043 |
| Gancaonin H                                  | <chem>(C=C4)(C)C)O)C</chem><br><chem>CC(=CCC1=C(C=C2C(=C1OC)C=C(O2)C3=C(C=C(C=C3)O)O)OC</chem>                                                     | red | 0.115908683 |
| Gancaonin I                                  | <chem>C</chem>                                                                                                                                     | red | 0.13368363  |

|                                                                                                                      |                                                                                |      |             |
|----------------------------------------------------------------------------------------------------------------------|--------------------------------------------------------------------------------|------|-------------|
| Glyasperin A                                                                                                         | <chem>CC(=CCC1=C(C=CC(=C1)C2=C(C(=O)C3=C(O2)C=C(C(=C3O)CC=C(C)C)O)O)O)C</chem> | red  | 0.11852305  |
| Glycyrrhiza flavonol A                                                                                               | <chem>CC1(C(CC2=C(O1)C=CC(=C2)C3=C(C(=O)C4=C(C=C(C(=C4O3)O)O)O)O)C</chem>      | red  | 0.091812581 |
| Kanzonol E                                                                                                           | <chem>CC(=CCC1=CC2=C(C=C1O)OC(=CC2=O)C3=CC4=C(C=C3)OC(C=C4)(C)C)C</chem>       | red  | 0.083846246 |
| Licoagroisoflavone                                                                                                   | <chem>CC(=C)[C@H]1CC2=C(O1)C=C3C(=C2O)C(=O)C(=CO3)C4=CC=C(C=C4)O</chem>        | red  | 0.117103422 |
| Odoratin                                                                                                             | <chem>COC1=C(C=C(C=C1)C2=COC3=CC(=C(C=C3C2=O)OC)O)O</chem>                     | red  | 0.107777418 |
| Phaseol                                                                                                              | <chem>CC(=CCC1=C(C=CC2=C1OC(=O)C3=C2OC4=C3C=CC(=C4)O)O)C</chem>                | red  | 0.117760173 |
| dehydroglyasperins C                                                                                                 | <chem>CC(C)=CCc1c(O)cc2c(c1O)C=C(c1ccc(O)cc1O)CO2</chem>                       | red  | 0.076871073 |
| quercetin                                                                                                            | <chem>C1=CC(=C(C=C1C2=C(C(=O)C3=C(C=C(C=C3O2)O)O)O)O)O</chem>                  | red  | 0.100361283 |
| isoliquiritigenin                                                                                                    | <chem>C1=CC(=CC=C1/C=C/C(=O)C2=C(C=C(C=C2)O)O)O</chem>                         | blue | 0.332180491 |
| (E)-1-(2,4-dihydroxyphenyl)-3-(2,2-dimethylchromen-6-yl)prop-2-en-1-one                                              | <chem>CC1(C=CC2=C(O1)C=CC(=C2)/C=C/C(=O)C3=C(C=C(C(=C3)O)O)C</chem>            | blue | 0.314256507 |
| (2R)-1-[2,4-dihydroxy-5-(3-methylbut-2-enyl)phenyl]-2-hydroxy-3-[4-hydroxy-3-(3-methylbut-2-enyl)phenyl]propan-1-one | <chem>CC(=CCC1=CC(=C(C=C1O)O)C(=O)[C@@H](CC2=CC(=C(C=C2)O)CC=C(C)C)O)C</chem>  | blue | 0.21656859  |
| (E)-1-(2,4-dihydroxyphenyl)-3-[4-hydroxy-3-(3-methylbut-2-enyl)phenyl]prop-2-en-1-one                                | <chem>CC(=CCC1=C(C=CC(=C1)/C=C/C(=O)C2=C(C=C(C(=C2)O)O)O)C</chem>              | blue | 0.292824335 |
| glyinflanin A                                                                                                        | <chem>CC(=CCC1=CC(=C(C=C1O)O)C(=O)CC(=O)C2=CC(=C(C=C2)O)C=C(C)C)C</chem>       | blue | 0.207539533 |

|                                                                                                              |                                                                                                                               |      |             |
|--------------------------------------------------------------------------------------------------------------|-------------------------------------------------------------------------------------------------------------------------------|------|-------------|
| (E)-1-[2,4-dihydroxy-3-(3-methylbut-2-enyl)phenyl]-3-[4-hydroxy-3-(3-methylbut-2-enyl)phenyl]prop-2-en-1-one | <chem>CC(=CCC1=C(C=CC(=C1)/C=C/C(=O)C2=C(C(=C(C=C2)O)CC=C(C)C)O)O)C</chem>                                                    | blue | 0.249408564 |
| (E)-1-[2,4-dihydroxy-3-(3-methylbut-2-enyl)phenyl]-3-(2,4-dihydroxyphenyl)prop-2-en-1-one                    | <chem>CC(=CCC1=C(C=CC(=C1O)C(=O)/C=C/C2=C(C=C(C=C2)O)O)O)C</chem>                                                             | blue | 0.227214696 |
| (E)-3-[3,4-dihydroxy-5-(3-methylbut-2-enyl)phenyl]-1-(2,4-dihydroxyphenyl)prop-2-en-1-one                    | <chem>CC(=CCC1=C(C(=CC(=C1)/C=C/C(=O)C2=C(C=C(C=C2)O)O)O)O)C</chem>                                                           | blue | 0.31563274  |
| neoisoliquiritin                                                                                             | <chem>C1=CC(=CC=C1/C=C/C(=O)C2=C(C=C(C=C2)O[C@H]3[C@@H]([C@H]([C@@H]([C@H](O3)CO)O)O)O)O</chem>                               | blue | 0.234715232 |
| Isoliquiritin                                                                                                | <chem>C1=CC(=CC=C1/C=C/C(=O)C2=C(C=C(C=C2)O)O)O[C@H]3[C@@H]([C@H]([C@@H]([C@H](O3)CO)O)O)O</chem>                             | blue | 0.240032913 |
| licuraside                                                                                                   | <chem>C1[C@@]([C@H]([C@@H](O1)O[C@@H]2[C@H]([C@@H]([C@H](O[C@H]2OC3=CC(=C(C=C3)C(=O)/C=C/C4=CC=C(C=C4)O)O)CO)O)O)(CO)O</chem> | blue | 0.194760852 |
| (Z)-1-(2,4-dihydroxyphenyl)-3-phenylprop-2-en-1-one                                                          | <chem>C1=CC=C(C=C1)/C=C/C(=O)C2=C(C=C(C=C2)O)O</chem>                                                                         | blue | 0.322643265 |
| 4,2',4',alpha-Tetrahydroxydihydrochalcone                                                                    | <chem>C1=CC(=CC=C1C[C@H](C(=O)C2=C(C=C(C=C2)O)O)O)O</chem>                                                                    | blue | 0.250530047 |
| 1-(5-hydroxy-2,2-dimethylchromen-6-yl)-3-(4-hydroxyphenyl)prop-2-en-1-one                                    | <chem>CC1(C)C=Cc2c(ccc(C(=O)C=Cc3ccc(O)cc3)c2O)O1</chem>                                                                      | blue | 0.290028962 |
| Corylifolinin                                                                                                | <chem>CC(=CCC1=C(C=CC(=C1O)C(=O)/C=C/C2=CC=C(C=C2)O)O)C</chem>                                                                | blue | 0.254116705 |

|                          |                                                                                                                                                                                                                   |      |             |
|--------------------------|-------------------------------------------------------------------------------------------------------------------------------------------------------------------------------------------------------------------|------|-------------|
| Licorice glycoside A     | <chem>COC1=C(C=CC(=C1)/C=C/C(=O)OC[C@]2(CO[C@H]([C@@H]2O)O[C@@H]3[C@H]([C@@H]([C@H](O[C@H]3OC4=CC=C(C=C4)/C=C/C(=O)C5=C(C=C(C=C5)O)O)CO)O)O)O</chem>                                                              | blue | 0.171838552 |
| Mairin                   | <chem>CC(=C)[C@@H]1CC[C@]2([C@H]1[C@H]3CC[C@@H]4[C@]5(CC[C@@H](C([C@@H]5CC[C@]4([C@@]3(CC2)C)C)(C)C)O)C(=O)O</chem>                                                                                               | gold | 0.134782088 |
| oleanolic acid           | <chem>C[C@]12CC[C@@H](C([C@@H]1CC[C@@]3([C@@H]2CC=C4[C@]3(CC[C@@]5([C@H]4CC(CC5)(C)C)C(=O)O)C)(C)C)O</chem>                                                                                                       | gold | 0.171398718 |
| 18beta-glycyrrhetic acid | <chem>C[C@]12CC[C@](C([C@H]1C3=C(C(=O)[C@@H]4[C@]5(CC[C@@H](C([C@@H]5CC[C@]4([C@@]3(CC2)C)C)(C)C)O)C)(C)C(=O)O</chem>                                                                                             | gold | 0.243574653 |
| apioglycyrrhizin         | <chem>CC1(C2CCC3(C(C2(CCC1OC4C(C(C(C(O4)C(=O)O)O)O)OC5C(C(CO5)(CO)O)O)C(=O)C=C6C3(CCC7(C6CC(CC7)(C)C(=O)O)C)C)C)C</chem>                                                                                          | gold | 0.157594014 |
| apioglycyrrhizin_qt      | <chem>CC1(C)[C@@H](O)CC[C@]2(C)[C@@H]3C(=O)C=C4[C@@H]5C[C@@](C)(C(=O)O)CC[C@@]5(C)CC[C@]4(C)[C@@]3(C)CC[C@@H]12</chem>                                                                                            | gold | 0.243574653 |
| liquoric acid            | <chem>C[C@]12CC[C@@H](C(C1CC[C@@]3(C2C(=O)C=C4[C@]3(C[C@@H]5[C@@]6([C@H]4C[C@@]([C@@H](C6)O5)(C)C(=O)O)C)C)C)O</chem>                                                                                             | gold | 0.194487639 |
| Glycyram                 | <chem>C[C@]12CC[C@](C([C@H]1C3=C(C(=O)[C@@H]4[C@]5(CC[C@@H](C([C@@H]5CC[C@]4([C@@]3(CC2)C)C)(C)C)O[C@@H]6[C@H]([C@H]([C@@H]([C@H](O6)C(=O)O)O)O[C@H]7[C@@H]([C@H]([C@@H]([C@H](O7)C(=O)O)O)O)C)(C)C(=O)O.N</chem> | gold | 0.185603356 |
| licorice-saponin C2      | <chem>C[C@]12CC[C@](CC1=C3C=C[C@@H]4[C@]5(CC[C@@H](C([C</chem>                                                                                                                                                    | gold | 0.154852039 |

|                        |                                                                                                                                                                                                                                                             |      |             |
|------------------------|-------------------------------------------------------------------------------------------------------------------------------------------------------------------------------------------------------------------------------------------------------------|------|-------------|
|                        | <chem>@@H]5CC[C@]4([C@@]3(CC2)C)C)(C)C)O[C@H]6[C@@H]([C@H]([C@@H]([C@H](O6)C(=O)O)O)O)[C@H]7[C@@H]([C@H]([C@@H]([C@H](O7)C(=O)O)O)O)C)(C)C(=O)O</chem>                                                                                                      |      |             |
| licorice-saponin C2_qt | <chem>CC1(C)[C@@H](O)CC[C@@]2(C)[C@H]1CC[C@]1(C)[C@@H]2C=CC2=C3C[C@@](C)(C(=O)O)CC[C@]3(C)CC[C@]21C</chem>                                                                                                                                                  | gold | 0.145429788 |
| licorice-saponin F3    | <chem>CC1(C)[C@H](O[C@H]2O[C@H](C(=O)O)[C@@H](O)[C@@H](O)[C@H]2O[C@@H]2O[C@H](C(=O)O)[C@@H](O)[C@@H](O)[C@H]2O[C@@H]2O[C@H](C(=O)O)[C@@H](O)[C@@H](O)[C@H]2O)CC[C@@]2(C)[C@H]1CC[C@]1(C)[C@@H]2CC=C2[C@H]3C[C@@]4(C)C[C@@H](OC4=O)[C@]3(C)CC[C@@]21C</chem> | gold | 0.209285563 |
| licorice-saponin F3_qt | <chem>CC1(C)[C@@H](O)CC[C@]2(C)[C@@H]3CC=C4[C@@H]5C[C@@]6(C)C[C@H](OC6=O)[C@@]5(C)CC[C@@]4(C)[C@@]3(C)CC[C@@H]12</chem>                                                                                                                                     | gold | 0.202011971 |
| licorice-saponin G2    | <chem>C[C@]12CC[C@](C[C@H]1C3=C(C(=O)[C@@H]4[C@]5(CC[C@@H]([C@]([C@@H]5CC[C@]4([C@@]3(CC2)C)C)(C)CO)O[C@H]6[C@@H]([C@H]([C@@H]([C@H](O6)C(=O)O)O)O)[C@H]7[C@@H]([C@H]([C@@H]([C@H](O7)C(=O)O)O)O)C)(C)C(=O)O</chem>                                         | gold | 0.168328881 |
| licorice-saponin G2_qt | <chem>C[C@@]12CC[C@]3(C)C(=CC(=O)[C@H]4[C@@]5(C)CC[C@H](O)[C@@](C)(CO)[C@@H]5CC[C@@]43C)[C@@H]1C[C@](C)(C(=O)O)CC2</chem>                                                                                                                                   | gold | 0.217532304 |
| licorice-saponin H2    | <chem>C[C@]12CC[C@@](C[C@H]1C3=CC(=O)[C@@H]4[C@]5(CC[C@@H](C[C@@H]5CC[C@]4([C@@]3(CC2)C)C)(C)C)O[C@H]6[C@@H]([C@H]([C@@H]([C@H](O6)C(=O)O)O)O)[C@H]7[C@</chem>                                                                                              | gold | 0.206498532 |



|                        |                                                                                                                                                                                                                |      |             |
|------------------------|----------------------------------------------------------------------------------------------------------------------------------------------------------------------------------------------------------------|------|-------------|
|                        | <chem> @H]([C@H]([C@@H]([C@H](O7)C(=O)O)O)O)C)(C)C(=O)OCC1(C)[C@@H](O)CC[C@]2(C)[C@@H]3C(=O)C=C4[C@@H]5C[C@@](C)(C(=O)O)CC[C@@]5(C)CC[C@@]4(C)[C@@]3(C)CC[C@@H]12 </chem>                                      | gold | 0.243574653 |
| licorice-saponin H2_qt | <chem> C[C@]12CC[C@](C[C@H]1C3=C[C@@H]4[C@]5(CC[C@@H]([C@]([C@@H]5CC[C@]4([C@@]3(CC2)C)C)(C)CO)O[C@H]6[C@@H]([C@H]([C@@H]([C@H](O6)C(=O)O)O)O[C@H]7[C@@H]([C@H]([C@@H]([C@H](O7)C(=O)O)O)O)C)(C)C(=O)O </chem> | gold | 0.171943902 |
| licorice-saponin J2    | <chem> C[C@]1(C(=O)O)CC[C@@]2(C)C[C@]3(C)C(=CC[C@@H]4[C@]3(C)CC[C@H]3[C@](C)(CO)[C@@H](O)CC[C@]43C)[C@@H]2C </chem>                                                                                            | gold | 0.175620544 |
| licorice-saponin J2_qt | <chem> C[C@]12CC[C@](C[C@H]1C3=C[C@@H]4[C@]5(CC[C@@H](C[C@@H]5CC[C@]4([C@@]3(C2)C)C)(C)C)O[C@H]6[C@@H]([C@H]([C@@H]([C@H](O6)C(=O)O)O)O[C@H]7[C@@H]([C@H]([C@@H]([C@H](O7)C(=O)O)O)O)C)(C)C(=O)O </chem>       | gold | 0.197065812 |
| licorice-saponin B2    | <chem> C[C@]12CC[C@](CC1=C3C=C[C@@H]4[C@]5(CC[C@@H]([C@]([C@@H]5CC[C@]4([C@@]3(C2)C)C)(C)CO)O[C@H]6[C@@H]([C@H]([C@@H]([C@H](O6)C(=O)O)O)O)O[C@H]7[C@@H]([C@H]([C@@H]([C@H](O7)C(=O)O)O)O)C)(C)C(=O)O </chem>  | gold | 0.144442166 |
| licorice-saponin K2    | <chem> C[C@@]12CC[C@]3(C)C(=C1C[C@](C)(C(=O)O)CC2)C=C[C@H]1[C@@]2(C)CC[C@H](O)[C@@](C)(CO)[C@@H]2CC[C@@]13C </chem>                                                                                            | gold | 0.14031408  |
| licorice-saponin K2_qt | <chem> C[C@]12CC[C@](C[C@H]1C3=C[C(=O)[C@@H]4[C@]5(CC[C@@H]H)(C[C@@H]5CC[C@]4([C@@]3(CC2)C)C)(C)C)O)C)(C)CO </chem>                                                                                            | gold | 0.196465332 |
| glycyrrhetol           |                                                                                                                                                                                                                |      |             |

|                                                                               |                                                                                                                                                                                                                 |      |             |
|-------------------------------------------------------------------------------|-----------------------------------------------------------------------------------------------------------------------------------------------------------------------------------------------------------------|------|-------------|
| 3,22-Dihydroxy-11-oxo-delta(12)-oleanene-27-alpha-methoxycarbonyl-29-oic acid | <chem>COC(=O)[C@@]12CC[C@]3(C)[C@@H](C[C@]4(C)C[C@H]3OC4=O)C1=CC(=O)[C@@H]1[C@@]3(C)CC[C@H](O)C(C)(C)[C@@H]3CC[C@]12C</chem>                                                                                    | gold | 0.198244355 |
| glabrolide                                                                    | <chem>C[C@]12CC[C@@H](C([C@@H]1CC[C@@]3([C@@H]2C(=O)C=C4[C@]3(CC[C@@]5([C@H]4C[C@@]6(C[C@H]5OC6=O)C)C)C)C)(C)C)O</chem>                                                                                         | gold | 0.224036519 |
| glycyrrhizin                                                                  | <chem>C[C@]12CC[C@](C[C@H]1C3=C(C(=O)[C@@H]4[C@]5(CC[C@@H](C([C@@H]5CC[C@]4([C@@]3(CC2)C)C)(C)C)O[C@@H]6[C@@H]([C@H]([C@@H]([C@H](O6)C(=O)O)O)O[C@H]7[C@@H]([C@H]([C@@H]([C@H](O7)C(=O)O)O)O)C)(C)C(=O)O</chem> | gold | 0.206498532 |
| uralsaponin B                                                                 | <chem>CC1(C2CCC3(C(C2(CCC1OC4C(C(C(C(O4)C(=O)O)O)OC5C(C(C(C(O5)C(=O)O)O)O)O)C)C(=O)C=C6C3(CCC7(C6CC(CC7)(C)C(=O)O)C)C)C)C</chem>                                                                                | gold | 0.215668626 |
| isoglabrolide                                                                 | <chem>CC1(C2CCC3(C(C2(CCC1O)C)C(=O)C=C4C3(CCC5(C46CC(CC5)(C(=O)O6)C)C)C)C</chem>                                                                                                                                | gold | 0.151339956 |
| 22β-acetylglabric acid                                                        | <chem>CC(=O)O[C@@H]1C[C@](C)(C(=O)O)C[C@@H]2C3=CC(=O)[C@@H]4[C@]5(C)CC[C@@H](O)C(C)(C)[C@H]5CC[C@@]4(C)[C@]3(C)CC[C@@]12C</chem>                                                                                | gold | 0.254544815 |
| 24-Hydroxy-11-deoxyglycyrrhetic acid                                          | <chem>C[C@]1(C(=O)O)CC[C@]2(C)CC[C@]3(C)C(=CC[C@@H]4[C@@]5(C)CC[C@H](O)[C@](C)(O)[C@@H]5CC[C@]43C)[C@@H]2C1</chem>                                                                                              | gold | 0.198451915 |
| 24-Hydroxyglycyrrhetic acid                                                   | <chem>CC12CCC(CC1C3=CC(=O)C4C5(CCC(C(C5CCC4(C3(CC2)C)C)(C)CO)O)C)(C)C(=O)O</chem>                                                                                                                               | gold | 0.217532304 |
| 3β-formylglabrolide                                                           | <chem>CC1(C)[C@H]2CC[C@]3(C)[C@H](C(=O)C=C4[C@H]5C[C@@]6(C)C[C@H](OC6=O)[C@]5(C)CC[C@]43C)[C@]2(C)CC[C@H]1O</chem>                                                                                              | gold | 0.225335402 |

|                              |                                                                                                                                                  |      |             |
|------------------------------|--------------------------------------------------------------------------------------------------------------------------------------------------|------|-------------|
| 11-deoxyglycyrrhetic acid    | <chem>CC1(C)[C@@H](O)CC[C@@]2(C)[C@H]1CC[C@]1(C)[C@@H]2C=C2[C@@H]3C[C@@](C)(C(=O)O)CC[C@]3(C)CC[C@]21C</chem>                                    | gold | 0.198722445 |
| Araboglycyrrhizin            | <chem>CC1(C2CCC3(C(C2(CCC1OC4C(C(C(C(O4)C(=O)O)O)O)OC5C(C(C(CO5)O)O)O)C(=O)C=C6C3(CCC7(C6CC(CC7)(C)C(=O)O)C)C)C</chem>                           | gold | 0.182825578 |
| Araboglycyrrhizin_qt         | <chem>CC1(C)[C@@H](O)CC[C@@]2(C)[C@@H]1CC[C@@]1(C)[C@H]2C(=O)C=C2[C@@H]3C[C@@](C)(C(=O)O)CC[C@]3(C)CC[C@]21C</chem>                              | gold | 0.243574653 |
| beta-Glycyrrhetic acid       | <chem>C[C@]12CC[C@](C[C@@H]1C3=CC(=O)[C@@H]4[C@]5(CC[C@@H](C([C@@H]5CC[C@]4([C@@]3(CC2)C)C)(C)C)O)C)(C)C(=O)O</chem>                             | gold | 0.243574653 |
| 18α-hydroxyglycyrrhetic acid | <chem>CC1(C)[C@@H](O)CC[C@]2(C)[C@@H]3C(=O)C=C4[C@@](C)(CC[C@@]5(C)CC[C@](C)(C(=O)O)C[C@]45O)[C@]3(C)CC[C@@H]12</chem>                           | gold | 0.171751894 |
| ursolic acid                 | <chem>C[C@@H]1CC[C@@]2(CC[C@@]3(C(=CC[C@H]4[C@]3(CC[C@@H]5[C@@]4(CC[C@@H](C5(C)C)O)C)C)[C@@H]2[C@H]1C)C)C(=O)O</chem>                            | gold | 0.155761004 |
| nicotiflorin                 | <chem>C[C@H]1[C@@H]([C@H]([C@H]([C@@H](O1)OC[C@@H]2[C@H]([C@@H]([C@H]([C@@H](O2)OC3=C(OC4=CC(=CC(=C4C3=O)O)O)C5=CC=C(C=C5)O)O)O)O)O)O</chem>     | gray | 0.952909692 |
| Narcissoside                 | <chem>C[C@H]1[C@@H]([C@H]([C@H]([C@@H](O1)OC[C@@H]2[C@H]([C@@H]([C@H]([C@@H](O2)OC3=C(OC4=CC(=CC(=C4C3=O)O)O)C5=CC(=C(C=C5)O)OC)O)O)O)O)O</chem> | gray | 0.756328448 |
| rutin                        | <chem>C[C@H]1[C@@H]([C@H]([C@H]([C@@H](O1)OC[C@@H]2[C@H]([C@@H]([C@H]([C@@H](O2</chem>                                                           | gray | 1.025207199 |

|                                                                                                                        |                                                                                                                                             |      |             |
|------------------------------------------------------------------------------------------------------------------------|---------------------------------------------------------------------------------------------------------------------------------------------|------|-------------|
|                                                                                                                        | <chem>)OC3=C(OC4=CC(=CC(=C4C3=O)O)O)C5=CC(=C(C=C5)O)O)O)O)O)O</chem>                                                                        |      |             |
| Hirsutrin                                                                                                              | <chem>C1=CC(=C(C=C1C2=C(C(=O)C3=C(C=C(C=C3O2)O)O)O[C@H]4[C@@H]([C@H]([C@@H]([C@H](O4)CO)O)O)O)O)O</chem>                                    | gray | 0.823572944 |
| Astragalin                                                                                                             | <chem>C1=CC(=CC=C1C2=C(C(=O)C3=C(C=C(C=C3O2)O)O)O[C@H]4[C@@H]([C@H]([C@@H]([C@H](O4)CO)O)O)O)O</chem>                                       | gray | 0.784666746 |
| Pinocembrin                                                                                                            | <chem>C1[C@H](OC2=CC(=CC(=C2C1=O)O)O)C3=CC=CC=C3</chem>                                                                                     | cyan | 0.18960015  |
| naringenin                                                                                                             | <chem>C1[C@H](OC2=CC(=CC(=C2C1=O)O)O)C3=CC=C(C=C3)O</chem>                                                                                  | cyan | 0.19072412  |
| 3-Hydroxyglabrol<br>(2S)-2-[4-hydroxy-3-(3-methylbut-2-enyl)phenyl]-8,8-dimethyl-2,3-dihydropyrano[2,3-f]chromen-4-one | <chem>CC(=CCC1=C(C=CC(=C1)[C@@H]2CC(=O)C3=C(O2)C4=C(C=C3)OC(C=C4)(C)C)O)C</chem>                                                            | cyan | 0.191109655 |
| euchrenone                                                                                                             | <chem>CC(=CCC1=C(C=CC2=C1O[C@@H](CC2=O)C3=C(C=C(C=C3)O)O)O)C</chem>                                                                         | cyan | 0.191348891 |
| naringin                                                                                                               | <chem>C[C@H]1[C@@H]([C@H]([C@H]([C@@H](O1)O[C@@H]2[C@H]([C@@H]([C@H](O[C@H]2OC3=CC(=C4C(=O)C[C@H](OC4=C3)C5=CC=C(C=C5)O)O)CO)O)O)O)O</chem> | cyan | 0.143830606 |
| Glepidotin B                                                                                                           | <chem>CC(=CCC1=C2C(=C(C=C1O)O)C(=O)[C@@H]([C@H](O2)C3=CC=CC=C3)O)C</chem>                                                                   | cyan | 0.129322805 |
| glabrol                                                                                                                | <chem>CC(=CCC1=C(C=CC(=C1)[C@@H]2CC(=O)C3=C(O2)C(=C(C=C3)O)CC=C(C)C)O)C</chem>                                                              | cyan | 0.207324963 |
| licorice glycoside E                                                                                                   | <chem>C1[C@H](OC2=C(C1=O)C=CC(=C2)O)C3=CC=C(C=C3)O[C@H]4C([C@H]([C@@H](C(O4)CO)O)O)O[C@H]5[C@H](C(CO5)(COC(=O)C6=CNC7=CC=CC=C76)O)O</chem>  | cyan | 0.109147886 |

|                                                                                                       |                                                                                                                                    |      |             |
|-------------------------------------------------------------------------------------------------------|------------------------------------------------------------------------------------------------------------------------------------|------|-------------|
| (2R)-2-[3,4-dihydroxy-5-(3-methylbut-2-enyl)phenyl]-5,7-dihydroxy-8-(3-methylbut-2-enyl)chroman-4-one | <chem>CC(C)=CCc1cc([C@H]2CC(=O)c3c(O)cc(O)c(CC=C(C)C)c3O2)cc(O)c1O</chem>                                                          | cyan | 0.164002995 |
| liquiritin                                                                                            | <chem>C1[C@H](OC2=C(C1=O)C=CC(=C2)O)C3=CC=C(C=C3)O[C@H]4[C@@H]([C@H]([C@@H]([C@H](O4)CO)O)O)O</chem>                               | cyan | 0.138589905 |
| Glabranin                                                                                             | <chem>CC(=CCC1=C2C(=C(C=C1O)O)C(=O)C[C@H](O2)C3=CC=CC=C3)C</chem>                                                                  | cyan | 0.144477907 |
| 4H-1-Benzopyran-4-one, 2-(4-(beta-D-glucopyranosyloxy)phenyl)-2,3-dihydro-5,7-dihydroxy-, (2S)-       | <chem>O=C1C[C@@H](c2ccc(O[C@@H]3O[C@H](CO)[C@@H](O)[C@H](O)[C@H]3O)cc2)Oc2cc(O)cc(O)c21</chem>                                     | cyan | 0.153650456 |
| Sigmoidin-B                                                                                           | <chem>CC(=CCC1=C(C(=CC(=C1)[C@@H]2CC(=O)C3=C(C=C(C=C3O2)O)O)O)O)C</chem>                                                           | cyan | 0.170669959 |
| neoliquiritin                                                                                         | <chem>C1[C@H](OC2=C(C1=O)C=CC(=C2)O[C@H]3[C@@H]([C@H]([C@@H]([C@H](O3)CO)O)O)O)C4=CC=C(C=C4)O</chem>                               | cyan | 0.135597264 |
| (2R)-7-hydroxy-2-(4-hydroxyphenyl)chroman-4-one                                                       | <chem>O=C1C[C@H](c2ccc(O)cc2)Oc2cc(O)ccc21</chem>                                                                                  | cyan | 0.196391585 |
| (2S)-7-hydroxy-2-(4-hydroxyphenyl)-8-(3-methylbut-2-enyl)chroman-4-one                                | <chem>CC(C)=CCc1c(O)ccc2c1O[C@H](c1ccc(O)cc1)CC2=O</chem>                                                                          | cyan | 0.198522861 |
| Liquiritin apioside                                                                                   | <chem>C1[C@H](OC2=C(C1=O)C=CC(=C2)O)C3=CC=C(C=C3)O[C@H]4[C@@H]([C@H]([C@@H]([C@H](O4)CO)O)O)[C@H]5[C@@H]([C@@H](CO5)(CO)O)O</chem> | cyan | 0.11773387  |
| isograbrol                                                                                            | <chem>CC(C)=CCc1cc2c(c(CC=C(C)C)c1O)O[C@@H](c1ccc(O)cc1)CC2=O</chem>                                                               | cyan | 0.186553935 |
| 6''-O-acetylliquiritin                                                                                | <chem>CC(=O)OC[C@@H]1[C@H]([C@H]([C@H]([C@H]([C@H](O1)OC2=</chem>                                                                  | cyan | 0.141590646 |

|                                                                        |                                                                                         |        |             |
|------------------------------------------------------------------------|-----------------------------------------------------------------------------------------|--------|-------------|
|                                                                        | <chem>CC=C(C=C2)[C@@H]3CC(=O)C4=C(O3)C=C(C=C4)O)O)O</chem>                              |        |             |
| 6-prenylated eriodictyol                                               | <chem>CC(C)=CCc1c(O)cc2c(c1O)C(=O)C[C@H](c1ccc(O)c(O)c1)O2</chem>                       | cyan   | 0.146998208 |
| 8-prenylated eriodictyol                                               | <chem>CC(C)=CCc1c(O)cc(O)c2c1O[C@@H](c1ccc(O)c(O)c1)CC2=O</chem>                        | cyan   | 0.153226111 |
| Kanzonol Z                                                             | <chem>CC(=CCC1=C(C=CC(=C1)[C@@H]2[C@H](C(=O)C3=C(O2)C4=C(C=C3)OC(C=C4)(C)C)O)O)C</chem> | cyan   | 0.188853933 |
| Xambioona                                                              | <chem>CC1(C=CC2=C(O1)C=CC(=C2)C3CC(=O)C4=C(O3)C5=C(C=C4)OC(C=C5)(C)C)C</chem>           | cyan   | 0.191474608 |
| (2R)-7-hydroxy-2-[4-hydroxy-3-(3-methylbut-2-enyl)phenyl]chroman-4-one | <chem>CC(C)=CCc1cc([C@H]2CC(=O)c3ccc(O)cc3O2)ccc1O</chem>                               | cyan   | 0.213839539 |
| 7,4'-Dihydroxyflavone                                                  | <chem>C1=CC(=CC=C1C2=CC(=O)C3=C(O2)C=C(C=C3)O)O</chem>                                  | gray   | 0.472040636 |
| 7-Methoxy-2-methylisoflavone                                           | <chem>CC1=C(C(=O)C2=C(O1)C=C(C=C2)OC)C3=CC=C(C=C3)[N+](=O)[O-]</chem>                   | gray   | 0.48557006  |
| Nortangeretin                                                          | <chem>C1=CC(=CC=C1C2=CC(=O)C3=C(C=C(C(=C3O2)O)O)O)O)O</chem>                            | gray   | 0.415178823 |
| 7-Acetoxy-2-methylisoflavone                                           | <chem>CC1=C(C(=O)C2=C(O1)C=C(C=C2)OC(=O)C)C3=CC=CC=C3</chem>                            | gray   | 0.557448741 |
| 7-hydroxy-2-methyl-3-phenyl-chromone                                   | <chem>Cc1oc2cc(O)ccc2c(=O)c1-c1ccccc1</chem>                                            | gray   | 0.606643885 |
| Glypallichalcone                                                       | <chem>COC1=CC=C(C=C1)C(=O)/C=C/C2=C(C=C(C=C2)O)OC</chem>                                | purple | 0.47327868  |
| echinatin                                                              | <chem>COC1=C(C=CC(=C1)O)/C=C/C(=O)C2=CC=C(C=C2)O</chem>                                 | purple | 0.512427893 |
| Licochalcone B                                                         | <chem>COC1=C(C=CC(=C1O)O)/C=C/C(=O)C2=CC=C(C=C2)O</chem>                                | purple | 0.500556506 |
| licochalcone C                                                         | <chem>CC(=CCC1=C(C=CC(=C1OC)/C=C/C(=O)C2=CC=C(C=C2)O)O)C</chem>                         | purple | 0.378198121 |
| licochalconeD                                                          | <chem>CC(=CCC1=C(C=CC(=C1)C(=O)/C=C/C2=C(C(=C(C=C2)O)O)OC)O)C</chem>                    | purple | 0.343296442 |
| licochalcone E                                                         | <chem>C[C@H](C1=C(C=C(C(=C1)/C=C/C(=O)C2=CC=C(C=C2)O)OC)O)C(=C)C</chem>                 | purple | 0.44542956  |
| licochalcone F                                                         | <chem>CC(C1=C(C=CC(=C1OC)/C=C/C(=O)C2=CC=C(C=C2)O)O)C(=C)C</chem>                       | purple | 0.464481486 |

|                                          |                                                                                                                                                   |        |             |
|------------------------------------------|---------------------------------------------------------------------------------------------------------------------------------------------------|--------|-------------|
|                                          | <chem>CC(C)(C=C)C1=C(C=C(C(=C1)/C=C/C(=O)C2=C(C=C(C(=C2)O)O)OC)O</chem>                                                                           | purple | 0.308023033 |
| licochalcone G                           |                                                                                                                                                   |        |             |
| 3,4,3',4'-Tetrahydroxy-2-methoxychalcone | <chem>COC1=C(C=CC(=C1O)O)/C=C/C(=O)C2=CC(=C(C=C2)O)O</chem>                                                                                       | purple | 0.437513047 |
|                                          | <chem>CC(C)(C=C)C1=C(C=C(C(=C1)/C=C/C(=O)C2=CC=C(C(=C2)O)OC)O</chem>                                                                              |        |             |
| licochalcone a                           |                                                                                                                                                   | purple | 0.356815191 |
|                                          | <chem>CC(=CCC1=C(C(=C(C=C1O)O)C=C(C(C)C)CCC2=CC(=C(C=C2)O)O)C</chem>                                                                              |        |             |
| Gancaonin R                              |                                                                                                                                                   | gray   | 2.080609802 |
|                                          | <chem>CC(=CCC1=C(C(=C(C=C1CCC2=CC(=C(C=C2)O)O)O)CC=C(C(C)C)O)C</chem>                                                                             |        |             |
| Gancaonin S                              |                                                                                                                                                   | gray   | 1.631970291 |
|                                          | <chem>CC(=CCC1=C(C2=C(C=C1O)OC(C(C2O)(C)C)CCC3=CC(=C(C=C3)O)O)C</chem>                                                                            |        |             |
| gancaonin T                              |                                                                                                                                                   | gray   | 1.206616337 |
|                                          | <chem>CC(=CCC1=C2CCC3=CC(=C(C=C3C2=C(C(=C1O)CC=C(C(C)C)O)O)O)C</chem>                                                                             |        |             |
| Gancaonin U                              |                                                                                                                                                   | gray   | 21.90654217 |
|                                          | <chem>CC(=CCC1=C2CCC3=CC(=C(C=C3C2=C(C(=C1O)O)O)O)O)C</chem>                                                                                      |        |             |
| Gancaonin V                              |                                                                                                                                                   | gray   | 21.90654217 |
|                                          | <chem>COC1=CC=C(C=C1)C2=COC3=C(C2=O)C=CC(=C3)O[C@H]4[C@@H]([C@H]([C@@H]([C@H](O4)CO)O)O)[C@H]5[C@@H]([C@@H]([C@H]([C@@H]([C@H](O5)CO)O)O)O</chem> | gray   | 0.974067113 |
| 2-methyl-5-propyl - nonane               |                                                                                                                                                   |        |             |
|                                          | <chem>COC1=CC=C(C=C1)C2=COC3=C(C2=O)C=CC(=C3)O[C@H]4[C@@H]([C@H]([C@@H]([C@H](O4)CO)O)O)[C@H]5[C@@H]([C@@H]([C@H]([C@@H]([C@H](O5)CO)O)O)O</chem> | gray   | 0.974067113 |
| glycyroside                              |                                                                                                                                                   | gray   | 0.974067113 |
|                                          | <chem>COC1=CC=C(C=C1)C2=COC3=C(C2=O)C=CC(=C3)O[C@H]4[C@@H]([C@H]([C@@H]([C@H](O4)CO)O)O)O</chem>                                                  |        |             |
| Ononin                                   |                                                                                                                                                   | gray   | 0.945931374 |
|                                          | <chem>COC1=CC2=C(C=C1)C(=O)C(=CO2)C3=CC=C(C=C3)O[C@H]4[C@@H]([C@H]([C@@H]([C@H](O4)CO)O)O)O</chem>                                                |        |             |
| Isoononin                                |                                                                                                                                                   | gray   | 0.817136492 |

**Table S2.** Related genes analysis of NOS2( pearson correlation coefficient greater than 0.3 ).

| Query    | Statistic   | P-value                | FDR (BH)               |
|----------|-------------|------------------------|------------------------|
| NOS2     | 1           | $1.00 \times 10^{-20}$ | $1.00 \times 10^{-16}$ |
| TIE1     | 0.45119314  | $5.25 \times 10^{-20}$ | $5.23 \times 10^{-16}$ |
| CDH5     | 0.441363928 | $4.05 \times 10^{-19}$ | $2.69 \times 10^{-15}$ |
| FLT4     | 0.431121024 | $3.18 \times 10^{-18}$ | $1.58 \times 10^{-14}$ |
| PLEKHG1  | 0.429387277 | $4.47 \times 10^{-18}$ | $1.78 \times 10^{-14}$ |
| ERG      | 0.415765931 | $6.12 \times 10^{-17}$ | $2.03 \times 10^{-13}$ |
| ESAM     | 0.411947709 | $1.25 \times 10^{-16}$ | $3.55 \times 10^{-13}$ |
| TSPAN18  | 0.407588082 | $2.79 \times 10^{-16}$ | $6.94 \times 10^{-13}$ |
| NOTCH4   | 0.406260864 | $3.55 \times 10^{-16}$ | $7.28 \times 10^{-13}$ |
| AOC3     | 0.405821177 | $3.84 \times 10^{-16}$ | $7.28 \times 10^{-13}$ |
| TMEM204  | 0.405577683 | $4.02 \times 10^{-16}$ | $7.28 \times 10^{-13}$ |
| RHOJ     | 0.40430597  | $5.06 \times 10^{-16}$ | $8.40 \times 10^{-13}$ |
| BCL6B    | 0.403654649 | $5.69 \times 10^{-16}$ | $8.42 \times 10^{-13}$ |
| MMRN2    | 0.403438591 | $5.92 \times 10^{-16}$ | $8.42 \times 10^{-13}$ |
| CLEC14A  | 0.403043317 | $6.35 \times 10^{-16}$ | $8.44 \times 10^{-13}$ |
| SOX7     | 0.399330164 | $1.23 \times 10^{-15}$ | $1.54 \times 10^{-12}$ |
| ZNF521   | 0.398982097 | $1.31 \times 10^{-15}$ | $1.54 \times 10^{-12}$ |
| EFNB2    | 0.396880033 | $1.90 \times 10^{-15}$ | $2.11 \times 10^{-12}$ |
| TEK      | 0.394520963 | $2.88 \times 10^{-15}$ | $2.96 \times 10^{-12}$ |
| PCDH12   | 0.394351372 | $2.97 \times 10^{-15}$ | $2.96 \times 10^{-12}$ |
| CDH13    | 0.392546153 | $4.07 \times 10^{-15}$ | $3.86 \times 10^{-12}$ |
| GPR116   | 0.39205194  | $4.43 \times 10^{-15}$ | $4.01 \times 10^{-12}$ |
| COL15A1  | 0.388719289 | $7.87 \times 10^{-15}$ | $6.82 \times 10^{-12}$ |
| EMP1     | 0.388182225 | $8.63 \times 10^{-15}$ | $7.16 \times 10^{-12}$ |
| HECW2    | 0.386232676 | $1.20 \times 10^{-14}$ | $9.59 \times 10^{-12}$ |
| CALCRL   | 0.385609345 | $1.34 \times 10^{-14}$ | $1.02 \times 10^{-11}$ |
| SHROOM4  | 0.382934139 | $2.10 \times 10^{-14}$ | $1.55 \times 10^{-11}$ |
| S1PR1    | 0.382636995 | $2.21 \times 10^{-14}$ | $1.57 \times 10^{-11}$ |
| LDB2     | 0.382039909 | $2.44 \times 10^{-14}$ | $1.68 \times 10^{-11}$ |
| CD34     | 0.381322368 | $2.75 \times 10^{-14}$ | $1.83 \times 10^{-11}$ |
| APOLD1   | 0.379908584 | $3.49 \times 10^{-14}$ | $2.24 \times 10^{-11}$ |
| ARHGEF15 | 0.378895908 | $4.12 \times 10^{-14}$ | $2.57 \times 10^{-11}$ |
| MYCT1    | 0.378591402 | $4.34 \times 10^{-14}$ | $2.62 \times 10^{-11}$ |
| ADAMTSL1 | 0.374836953 | $8.04 \times 10^{-14}$ | $4.71 \times 10^{-11}$ |
| CYYR1    | 0.37268289  | $1.14 \times 10^{-13}$ | $6.50 \times 10^{-11}$ |
| PDE2A    | 0.370286664 | $1.68 \times 10^{-13}$ | $9.31 \times 10^{-11}$ |
| CXorf36  | 0.367723903 | $2.54 \times 10^{-13}$ | $1.37 \times 10^{-10}$ |
| ROBO4    | 0.367541952 | $2.61 \times 10^{-13}$ | $1.37 \times 10^{-10}$ |
| NAV1     | 0.364895773 | $3.98 \times 10^{-13}$ | $2.03 \times 10^{-10}$ |
| DOCK9    | 0.364613346 | $4.16 \times 10^{-13}$ | $2.07 \times 10^{-10}$ |
| HSPA12B  | 0.364319746 | $4.35 \times 10^{-13}$ | $2.12 \times 10^{-10}$ |



---

|           |             |                        |                        |
|-----------|-------------|------------------------|------------------------|
| SHE       | 0.36223878  | $6.04 \times 10^{-13}$ | $2.86 \times 10^{-10}$ |
| PLVAP     | 0.360590155 | $7.81 \times 10^{-13}$ | $3.62 \times 10^{-10}$ |
| ADAMTS7   | 0.359791115 | $8.84 \times 10^{-13}$ | $4.00 \times 10^{-10}$ |
| ALDH1A3   | 0.358039853 | $1.16 \times 10^{-12}$ | $5.13 \times 10^{-10}$ |
| COL12A1   | 0.356295672 | $1.52 \times 10^{-12}$ | $6.56 \times 10^{-10}$ |
| PXDN      | 0.354817905 | $1.90 \times 10^{-12}$ | $8.05 \times 10^{-10}$ |
| CD93      | 0.353959971 | $2.17 \times 10^{-12}$ | $8.84 \times 10^{-10}$ |
| USHBP1    | 0.353935405 | $2.17 \times 10^{-12}$ | $8.84 \times 10^{-10}$ |
| HSPG2     | 0.352546983 | $2.68 \times 10^{-12}$ | $1.07 \times 10^{-9}$  |
| GAS6      | 0.352257516 | $2.80 \times 10^{-12}$ | $1.09 \times 10^{-9}$  |
| NOVA2     | 0.351585277 | $3.10 \times 10^{-12}$ | $1.19 \times 10^{-9}$  |
| KDR       | 0.351140982 | $3.32 \times 10^{-12}$ | $1.25 \times 10^{-9}$  |
| EDNRB     | 0.350914387 | $3.43 \times 10^{-12}$ | $1.25 \times 10^{-9}$  |
| ITGB3     | 0.350855223 | $3.46 \times 10^{-12}$ | $1.25 \times 10^{-9}$  |
| FZD4      | 0.34978168  | $4.07 \times 10^{-12}$ | $1.45 \times 10^{-9}$  |
| CLEC1A    | 0.348365841 | $5.03 \times 10^{-12}$ | $1.73 \times 10^{-9}$  |
| FAM70B    | 0.348343598 | $5.04 \times 10^{-12}$ | $1.73 \times 10^{-9}$  |
| PTPRB     | 0.347179441 | $6.00 \times 10^{-12}$ | $1.99 \times 10^{-9}$  |
| EXOC3L2   | 0.346724081 | $6.42 \times 10^{-12}$ | $2.10 \times 10^{-9}$  |
| ANO1      | 0.34631282  | $6.82 \times 10^{-12}$ | $2.19 \times 10^{-9}$  |
| KIF26A    | 0.346154652 | $6.98 \times 10^{-12}$ | $2.20 \times 10^{-9}$  |
| REPS2     | 0.346069953 | $7.07 \times 10^{-12}$ | $2.20 \times 10^{-9}$  |
| EML1      | 0.345296484 | $7.92 \times 10^{-12}$ | $2.43 \times 10^{-9}$  |
| TMEM233   | 0.344611442 | $8.76 \times 10^{-12}$ | $2.65 \times 10^{-9}$  |
| GLT8D2    | 0.344390845 | $9.05 \times 10^{-12}$ | $2.66 \times 10^{-9}$  |
| TAL1      | 0.344324932 | $9.14 \times 10^{-12}$ | $2.66 \times 10^{-9}$  |
| GJD3      | 0.344263554 | $9.22 \times 10^{-12}$ | $2.66 \times 10^{-9}$  |
| IGFBP5    | 0.343873278 | $9.77 \times 10^{-12}$ | $2.74 \times 10^{-9}$  |
| FBN1      | 0.343871772 | $9.77 \times 10^{-12}$ | $2.74 \times 10^{-9}$  |
| CDC42EP3  | 0.34335468  | $1.05 \times 10^{-11}$ | $2.92 \times 10^{-9}$  |
| PCDH17    | 0.343115767 | $1.09 \times 10^{-11}$ | $2.98 \times 10^{-9}$  |
| SLCO2A1   | 0.342803276 | $1.14 \times 10^{-11}$ | $3.05 \times 10^{-9}$  |
| JAM2      | 0.342772875 | $1.15 \times 10^{-11}$ | $3.05 \times 10^{-9}$  |
| APLNR     | 0.342509354 | $1.19 \times 10^{-11}$ | $3.13 \times 10^{-9}$  |
| ARHGAP6   | 0.341991391 | $1.29 \times 10^{-11}$ | $3.33 \times 10^{-9}$  |
| GNA14     | 0.341695438 | $1.34 \times 10^{-11}$ | $3.43 \times 10^{-9}$  |
| LRRC70    | 0.341452975 | $1.39 \times 10^{-11}$ | $3.51 \times 10^{-9}$  |
| C3orf70   | 0.340718519 | $1.55 \times 10^{-11}$ | $3.85 \times 10^{-9}$  |
| SH2D3C    | 0.340289067 | $1.65 \times 10^{-11}$ | $4.05 \times 10^{-9}$  |
| SPARC     | 0.339976924 | $1.72 \times 10^{-11}$ | $4.19 \times 10^{-9}$  |
| C20orf160 | 0.338586988 | $2.11 \times 10^{-11}$ | $4.99 \times 10^{-9}$  |
| PEAR1     | 0.338110144 | $2.26 \times 10^{-11}$ | $5.29 \times 10^{-9}$  |
| SLIT3     | 0.337378563 | $2.50 \times 10^{-11}$ | $5.80 \times 10^{-9}$  |
| ZNF25     | 0.337233208 | $2.56 \times 10^{-11}$ | $5.86 \times 10^{-9}$  |

---

|              |             |                        |                       |
|--------------|-------------|------------------------|-----------------------|
| EPHA4        | 0.337084702 | $2.61 \times 10^{-11}$ | $5.91 \times 10^{-9}$ |
| ARAP3        | 0.336886835 | $2.69 \times 10^{-11}$ | $6.02 \times 10^{-9}$ |
| FAM124B      | 0.335659374 | $3.20 \times 10^{-11}$ | $7.09 \times 10^{-9}$ |
| GPR4         | 0.335567203 | $3.24 \times 10^{-11}$ | $7.10 \times 10^{-9}$ |
| PTPRM        | 0.335477706 | $3.29 \times 10^{-11}$ | $7.12 \times 10^{-9}$ |
| OLFML2A      | 0.334667422 | $3.69 \times 10^{-11}$ | $7.90 \times 10^{-9}$ |
| ETS1         | 0.334533253 | $3.76 \times 10^{-11}$ | $7.96 \times 10^{-9}$ |
| NID2         | 0.334175533 | $3.95 \times 10^{-11}$ | $8.29 \times 10^{-9}$ |
| SCARF1       | 0.333960035 | $4.08 \times 10^{-11}$ | $8.46 \times 10^{-9}$ |
| PODXL        | 0.333471458 | $4.37 \times 10^{-11}$ | $8.97 \times 10^{-9}$ |
| EMCN         | 0.333341381 | $4.45 \times 10^{-11}$ | $9.04 \times 10^{-9}$ |
| LRRC32       | 0.332957905 | $4.70 \times 10^{-11}$ | $9.45 \times 10^{-9}$ |
| ELTD1        | 0.332778773 | $4.82 \times 10^{-11}$ | $9.59 \times 10^{-9}$ |
| ARL15        | 0.332512847 | $5.00 \times 10^{-11}$ | $9.86 \times 10^{-9}$ |
| ADCY4        | 0.331865487 | $5.48 \times 10^{-11}$ | $1.07 \times 10^{-8}$ |
| SNRK         | 0.331344725 | $5.89 \times 10^{-11}$ | $1.14 \times 10^{-8}$ |
| EXOC3L       | 0.331075082 | $6.12 \times 10^{-11}$ | $1.17 \times 10^{-8}$ |
| SRL          | 0.329900038 | $7.21 \times 10^{-11}$ | $1.37 \times 10^{-8}$ |
| FHL2         | 0.32933569  | $7.80 \times 10^{-11}$ | $1.47 \times 10^{-8}$ |
| NOS3         | 0.328950283 | $8.23 \times 10^{-11}$ | $1.53 \times 10^{-8}$ |
| FAM198B      | 0.328225699 | $9.10 \times 10^{-11}$ | $1.68 \times 10^{-8}$ |
| SOX17        | 0.326832224 | $1.10 \times 10^{-10}$ | $2.02 \times 10^{-8}$ |
| ENG          | 0.325460056 | $1.33 \times 10^{-10}$ | $2.41 \times 10^{-8}$ |
| ZNF423       | 0.325183838 | $1.38 \times 10^{-10}$ | $2.48 \times 10^{-8}$ |
| FBLN2        | 0.324888308 | $1.44 \times 10^{-10}$ | $2.56 \times 10^{-8}$ |
| MAP1B        | 0.324679115 | $1.48 \times 10^{-10}$ | $2.62 \times 10^{-8}$ |
| ZFPM2        | 0.324533701 | $1.51 \times 10^{-10}$ | $2.64 \times 10^{-8}$ |
| PLAT         | 0.324330035 | $1.56 \times 10^{-10}$ | $2.70 \times 10^{-8}$ |
| ITGA10       | 0.324071027 | $1.61 \times 10^{-10}$ | $2.75 \times 10^{-8}$ |
| COL4A1       | 0.324058541 | $1.61 \times 10^{-10}$ | $2.75 \times 10^{-8}$ |
| UACA         | 0.323856426 | $1.66 \times 10^{-10}$ | $2.80 \times 10^{-8}$ |
| ARHGEF10     | 0.323662694 | $1.70 \times 10^{-10}$ | $2.84 \times 10^{-8}$ |
| LOC100126784 | 0.32359566  | $1.72 \times 10^{-10}$ | $2.84 \times 10^{-8}$ |
| GJA4         | 0.323583353 | $1.72 \times 10^{-10}$ | $2.84 \times 10^{-8}$ |
| PRR16        | 0.322382642 | $2.03 \times 10^{-10}$ | $3.30 \times 10^{-8}$ |
| F2R          | 0.322279872 | $2.06 \times 10^{-10}$ | $3.30 \times 10^{-8}$ |
| SPRY1        | 0.322257741 | $2.06 \times 10^{-10}$ | $3.30 \times 10^{-8}$ |
| MID2         | 0.32223224  | $2.07 \times 10^{-10}$ | $3.30 \times 10^{-8}$ |
| THBD         | 0.321946457 | $2.15 \times 10^{-10}$ | $3.40 \times 10^{-8}$ |
| NOTCH3       | 0.321619225 | $2.25 \times 10^{-10}$ | $3.53 \times 10^{-8}$ |
| TMOD2        | 0.31991046  | $2.83 \times 10^{-10}$ | $4.41 \times 10^{-8}$ |
| SYNPO        | 0.319683714 | $2.92 \times 10^{-10}$ | $4.51 \times 10^{-8}$ |
| TGFB1I1      | 0.319583642 | $2.96 \times 10^{-10}$ | $4.54 \times 10^{-8}$ |

---

|           |             |                        |                       |
|-----------|-------------|------------------------|-----------------------|
| PALM2-    |             |                        |                       |
| AKAP2     | 0.31944978  | $3.01 \times 10^{-10}$ | $4.58 \times 10^{-8}$ |
| ZNF366    | 0.319401428 | $3.03 \times 10^{-10}$ | $4.58 \times 10^{-8}$ |
| PDGFB     | 0.31921117  | $3.11 \times 10^{-10}$ | $4.66 \times 10^{-8}$ |
| SASH1     | 0.318176472 | $3.57 \times 10^{-10}$ | $5.30 \times 10^{-8}$ |
| TCF21     | 0.318136563 | $3.59 \times 10^{-10}$ | $5.30 \times 10^{-8}$ |
| DPYSL2    | 0.317662583 | $3.83 \times 10^{-10}$ | $5.61 \times 10^{-8}$ |
| CYTH3     | 0.317398017 | $3.97 \times 10^{-10}$ | $5.77 \times 10^{-8}$ |
| PDLIM2    | 0.316595976 | $4.41 \times 10^{-10}$ | $6.36 \times 10^{-8}$ |
| JAM3      | 0.316556522 | $4.44 \times 10^{-10}$ | $6.36 \times 10^{-8}$ |
| SLC46A3   | 0.316152003 | $4.68 \times 10^{-10}$ | $6.66 \times 10^{-8}$ |
| TCF4      | 0.315766974 | $4.93 \times 10^{-10}$ | $6.96 \times 10^{-8}$ |
| LOXL2     | 0.315712045 | $4.96 \times 10^{-10}$ | $6.96 \times 10^{-8}$ |
| MXRA5     | 0.315192727 | $5.31 \times 10^{-10}$ | $7.40 \times 10^{-8}$ |
| DLL4      | 0.314252217 | $6.02 \times 10^{-10}$ | $8.32 \times 10^{-8}$ |
| HEY2      | 0.313128735 | $6.97 \times 10^{-10}$ | $9.52 \times 10^{-8}$ |
| FAT4      | 0.31286596  | $7.22 \times 10^{-10}$ | $9.76 \times 10^{-8}$ |
| LAMA2     | 0.312830928 | $7.25 \times 10^{-10}$ | $9.76 \times 10^{-8}$ |
| LZTS1     | 0.312772653 | $7.31 \times 10^{-10}$ | $9.77 \times 10^{-8}$ |
| C1orf111  | 0.31271971  | $7.36 \times 10^{-10}$ | $9.77 \times 10^{-8}$ |
| PSD3      | 0.312362395 | $7.71 \times 10^{-10}$ | $1.02 \times 10^{-7}$ |
| C1QTNF2   | 0.312256225 | $7.82 \times 10^{-10}$ | $1.02 \times 10^{-7}$ |
| FSTL1     | 0.312140886 | $7.94 \times 10^{-10}$ | $1.03 \times 10^{-7}$ |
| RPS6KA2   | 0.311404117 | $8.74 \times 10^{-10}$ | $1.12 \times 10^{-7}$ |
| KLHL20    | 0.311174791 | $9.00 \times 10^{-10}$ | $1.15 \times 10^{-7}$ |
| GPR124    | 0.311039841 | $9.16 \times 10^{-10}$ | $1.16 \times 10^{-7}$ |
| DUSP1     | 0.310617761 | $9.68 \times 10^{-10}$ | $1.22 \times 10^{-7}$ |
| FGD5      | 0.310140112 | $1.03 \times 10^{-9}$  | $1.29 \times 10^{-7}$ |
| ZXDA      | 0.309836113 | $1.07 \times 10^{-9}$  | $1.33 \times 10^{-7}$ |
| COL8A1    | 0.309446633 | $1.13 \times 10^{-9}$  | $1.39 \times 10^{-7}$ |
| LHX6      | 0.309249709 | $1.16 \times 10^{-9}$  | $1.42 \times 10^{-7}$ |
| EGFLAM    | 0.308775144 | $1.23 \times 10^{-9}$  | $1.50 \times 10^{-7}$ |
| MYLK      | 0.308479844 | $1.28 \times 10^{-9}$  | $1.55 \times 10^{-7}$ |
| FAM26E    | 0.308376082 | $1.29 \times 10^{-9}$  | $1.56 \times 10^{-7}$ |
| MYOCD     | 0.307968768 | $1.36 \times 10^{-9}$  | $1.63 \times 10^{-7}$ |
| AKT3      | 0.307966088 | $1.36 \times 10^{-9}$  | $1.63 \times 10^{-7}$ |
| LOC399959 | 0.307775916 | $1.40 \times 10^{-9}$  | $1.66 \times 10^{-7}$ |
| KANK3     | 0.306781736 | $1.59 \times 10^{-9}$  | $1.85 \times 10^{-7}$ |
| EPAS1     | 0.306594293 | $1.63 \times 10^{-9}$  | $1.88 \times 10^{-7}$ |
| VEGFC     | 0.306299048 | $1.69 \times 10^{-9}$  | $1.94 \times 10^{-7}$ |
| NPR1      | 0.306270208 | $1.69 \times 10^{-9}$  | $1.94 \times 10^{-7}$ |
| GPR17     | 0.30614866  | $1.72 \times 10^{-9}$  | $1.96 \times 10^{-7}$ |
| COL4A2    | 0.305466103 | $1.88 \times 10^{-9}$  | $2.12 \times 10^{-7}$ |
| RASGRF2   | 0.30544276  | $1.88 \times 10^{-9}$  | $2.12 \times 10^{-7}$ |

---

|         |             |                       |                       |
|---------|-------------|-----------------------|-----------------------|
| DCHS1   | 0.304714326 | $2.07 \times 10^{-9}$ | $2.31 \times 10^{-7}$ |
| ELK3    | 0.30445636  | $2.14 \times 10^{-9}$ | $2.38 \times 10^{-7}$ |
| COL6A2  | 0.303264438 | $2.48 \times 10^{-9}$ | $2.75 \times 10^{-7}$ |
| MICAL2  | 0.303023593 | $2.56 \times 10^{-9}$ | $2.82 \times 10^{-7}$ |
| IGFBP7  | 0.30273372  | $2.66 \times 10^{-9}$ | $2.91 \times 10^{-7}$ |
| BMX     | 0.302265543 | $2.82 \times 10^{-9}$ | $3.05 \times 10^{-7}$ |
| CACNA1C | 0.302153871 | $2.86 \times 10^{-9}$ | $3.08 \times 10^{-7}$ |
| SNED1   | 0.302102621 | $2.87 \times 10^{-9}$ | $3.08 \times 10^{-7}$ |
| HEPH    | 0.301592435 | $3.07 \times 10^{-9}$ | $3.27 \times 10^{-7}$ |
| FXYP6   | 0.301316226 | $3.17 \times 10^{-9}$ | $3.35 \times 10^{-7}$ |
| PLCL1   | 0.301302068 | $3.18 \times 10^{-9}$ | $3.35 \times 10^{-7}$ |
| CALD1   | 0.300709703 | $3.42 \times 10^{-9}$ | $3.58 \times 10^{-7}$ |
| TRO     | 0.300685925 | $3.43 \times 10^{-9}$ | $3.58 \times 10^{-7}$ |
| MYH11   | 0.300448226 | $3.54 \times 10^{-9}$ | $3.67 \times 10^{-7}$ |
| SLC41A2 | 0.300019199 | $3.73 \times 10^{-9}$ | $3.83 \times 10^{-7}$ |

---
